# Supplementary material
Source: PubMed Central journal article supplement (PMC9275829)
Supplement: NIHMS895985-supplement-supplement_1.pdf [file NIHMS895985-supplement-supplement_1.pdf]

**eTable 1.** Search Terms

|                                                                                                                                                                                                                               |
|-------------------------------------------------------------------------------------------------------------------------------------------------------------------------------------------------------------------------------|
| Preoperative                                                                                                                                                                                                                  |
| Patient education – “patient education”                                                                                                                                                                                       |
| Immediate preoperative                                                                                                                                                                                                        |
| Bowel preparation – “bowel preparation”                                                                                                                                                                                       |
| Preoperative bathing (chlorhexidine) – “preoperative bathing”                                                                                                                                                                 |
| Reduced fasting – “fasting”                                                                                                                                                                                                   |
| Intraoperative                                                                                                                                                                                                                |
| Skin preparation – “skin preparation”; “surgical site infection”                                                                                                                                                              |
| Surgical technique – “surgical technique”                                                                                                                                                                                     |
| Minimize drains – “drain” ; “nasogastric”                                                                                                                                                                                     |
| Postoperative                                                                                                                                                                                                                 |
| Early mobilization – “early mobilization” ; “early ambulation” ; “ambulation” ; “mobilization”                                                                                                                                |
| Early alimentation – “early feeding”                                                                                                                                                                                          |
| Early urinary bladder catheter removal – “Foley avoidance” ; “urinary catheter avoidance” ; “urinary bladder catheter avoidance” ; “intervention” ; “catheter-associated urinary tract infection” ; “urinary tract infection” |
| Early IV fluid discontinuation – “IV fluid discontinuation”; “intravenous fluid discontinuation” ; “fluid therapy”                                                                                                            |
| Postoperative VTE prophylaxis – “venous thromboembolism prophylaxis”; “VTE prophylaxis”; “thromboprophylaxis”                                                                                                                 |
| Glucose management – “glucose control” “surgical site infection”                                                                                                                                                              |
| General search terms – “surgery” ; “colon” ; “fast track” ; “enhanced recovery” ; “meta-analysis” ; “meta” ; “systematic review” ; “randomized controlled trial” ; “randomized trial” ; “abdominal surgery”                   |

VTE, venous thromboembolism

**eTable 2.** AHRQ Safety Program for Improving Surgical Care and Recovery (ISCR) Colorectal Protocol

|                                                             |
|-------------------------------------------------------------|
| Preoperative                                                |
| Patient education                                           |
| Immediate preoperative                                      |
| Mechanical and <i>per os</i> antibiotic bowel preparation   |
| Preoperative (at-home) bathing                              |
| Reduced Fasting                                             |
| Carbohydrate loading                                        |
| Preoperative VTE chemoprophylaxis                           |
| Multi-modal pre-anesthesia medication                       |
| Mu opioid antagonists                                       |
| Intraoperative                                              |
| Antibiotic prophylaxis                                      |
| Skin preparation                                            |
| Surgical technique                                          |
| Blood transfusion                                           |
| Fluids/goal-directed fluid therapy                          |
| Normothermia                                                |
| Minimization of drains/nasogastric tube                     |
| Standard intraoperative anesthesia pathway                  |
| Postoperative                                               |
| Early mobilization                                          |
| Early alimentation                                          |
| Early urinary bladder catheter removal                      |
| Early discontinuation of maintenance In vitro fertilization |
| Postoperative VTE chemoprophylaxis                          |
| Glucose management                                          |
| Standard postoperative multimodal analgesic regimen         |

VTE, venous thromboembolism
